# Supplementary material for: Hydrogel-derived VPO4/porous carbon framework for enhanced lithium and sodium storage
Source: Royal Society of Chemistry journal article supplement (doi:10.1039/d0nr00460j), 2020-01-01
Supplement: d0nr00460j1.pdf [file d0nr00460j1.pdf]

## Hydrogel-derived VPO<sub>4</sub>/porous carbon framework for enhanced lithium and sodium storage

Donglei Guo<sup>a</sup>, Mengke Yang<sup>a</sup>, Yicong Li<sup>a</sup>, Yuwen xue<sup>a</sup>, Guilong Liu<sup>a</sup>, Naiteng Wu<sup>a,c</sup>,  
Jang-Kyo Kim<sup>\*b</sup> and Xianming Liu<sup>\*a</sup>

<sup>a</sup> Key Laboratory of Function-oriented Porous Materials, College of Chemistry and Chemical Engineering, Luoyang Normal University, Luoyang, 471934, P. R. China.

<sup>b</sup> Department of Mechanical and Aerospace Engineering, Hong Kong University of Science and Technology, Clear Water Bay, Kowloon, Hong Kong, P. R. China.

<sup>c</sup> College of Materials and Chemical Engineering, China Three Gorges University, Yichang, 443002, P. R. China.

\*Email: myclxm@163.com (Xianming Liu) & mejkkim@ust.hk (Jang-Kyo Kim)

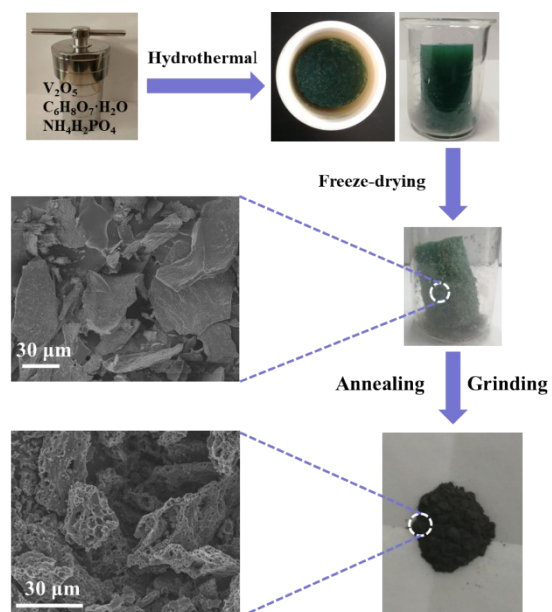

**Fig. S1.** Digital photographs and FESEM images of precursor sample material after freeze-drying and 3DHP-VPO<sub>4</sub>@C.

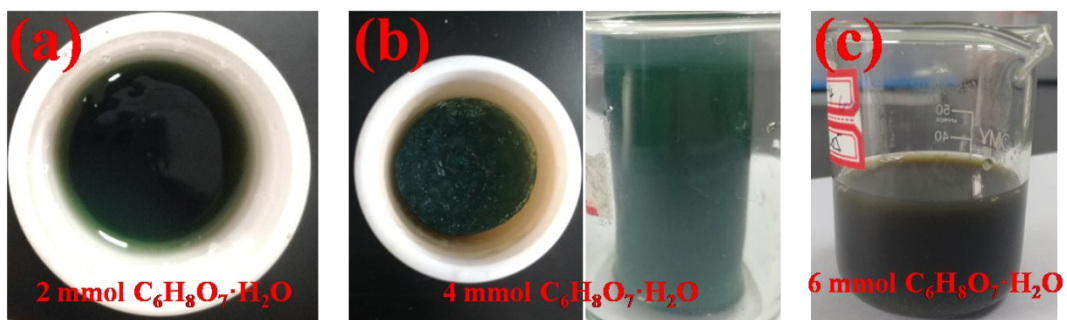

**Fig. S2.** Digital photographs of hybrid hydrogel obtained after hydrothermal treatment for different  $C_6H_8O_7 \cdot H_2O$  contents of (a) 2, (b) 4 and (c) 6 mmol.

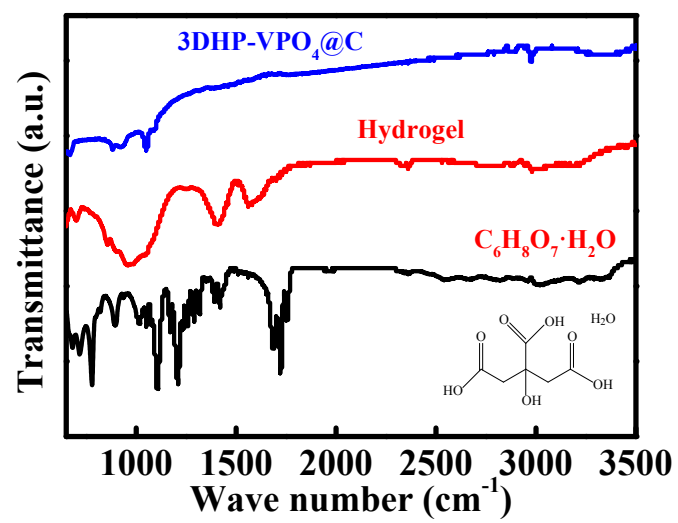

**Fig. S3.** FT-IR spectras of C<sub>6</sub>H<sub>8</sub>O<sub>7</sub>·H<sub>2</sub>O, hydrogel and 3DHP-VPO<sub>4</sub>@C.

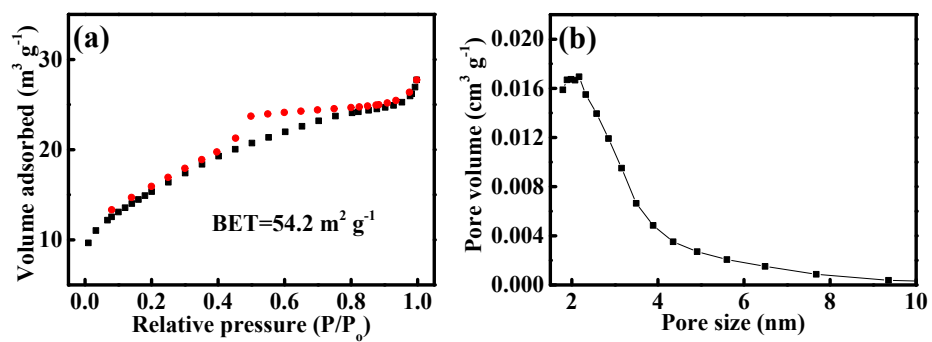

**Fig. S4.** N<sub>2</sub> adsorption-desorption isotherm (a) and pore size distribution (b) of 3DHP-VPO<sub>4</sub>@C according to the NLDFT model.

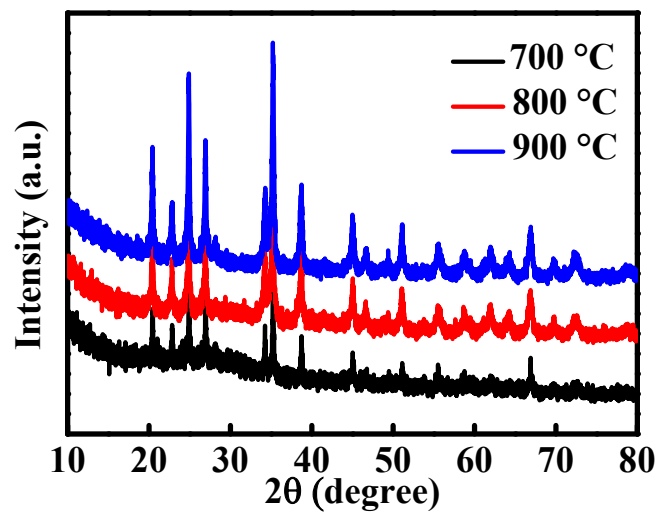

**Fig. S5.** XRD patterns of VPO<sub>4</sub>@C calcined at 700, 800 and 900 °C.

All XRD peaks of 3DHP-VPO<sub>4</sub>@C, VPO<sub>4</sub>@C-700 and VPO<sub>4</sub>@C-900 can be assigned to the orthorhombic VPO<sub>4</sub> phase (PDF#076-2023).

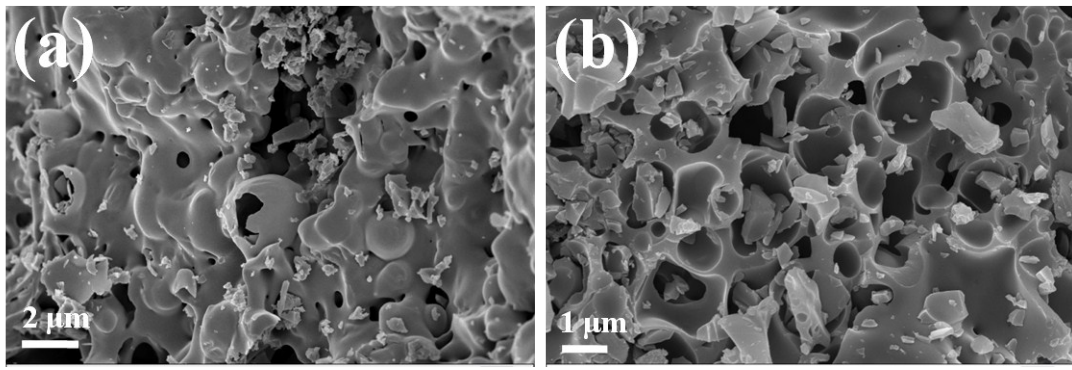

**Fig. S6.** FESEM images of VPO<sub>4</sub>@C calcined at 700 (a) and 900 °C (b).

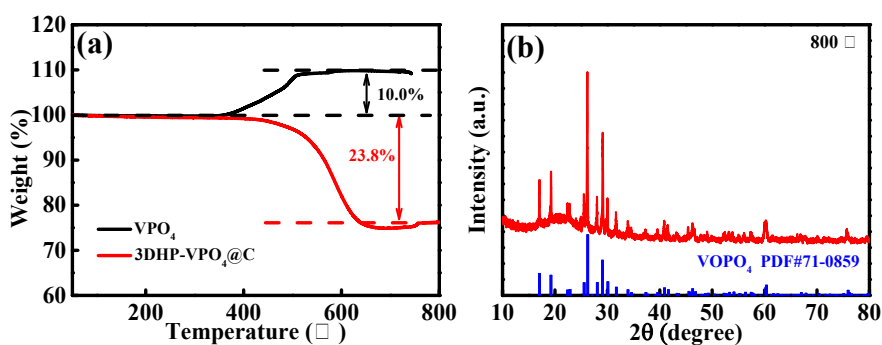

**Fig. S7.** (a) TGA curves of 3DHP-VPO<sub>4</sub>@C and VPO<sub>4</sub> in the temperature range of 30-800 °C in the flowing of air atmosphere; (b) XRD pattern for final product of VPO<sub>4</sub> sintered at 800 °C under air atmosphere.

The TGA test is operated in air flow to calculate the carbon content of 3DHP-VPO<sub>4</sub>@C. The apparent increasing mass of VPO<sub>4</sub> is corresponded to the oxidation of VPO<sub>4</sub> to VOPO<sub>4</sub> (**Fig. S6b**). In contrast, the rapid mass loss for 3DHP-VPO<sub>4</sub>@C is related to the removal of carbonous materials. The carbon content in 3DHP-VPO<sub>4</sub>@C is determined to be 33.8 wt%.



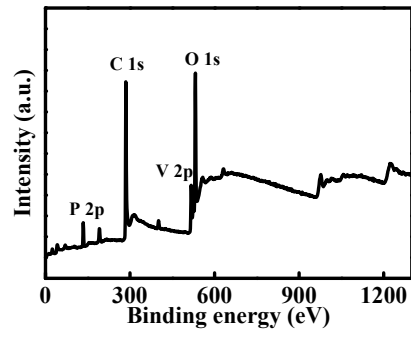

**Fig. S8.** XPS curves of survey spectrum of 3DHP-VPO<sub>4</sub>@C.

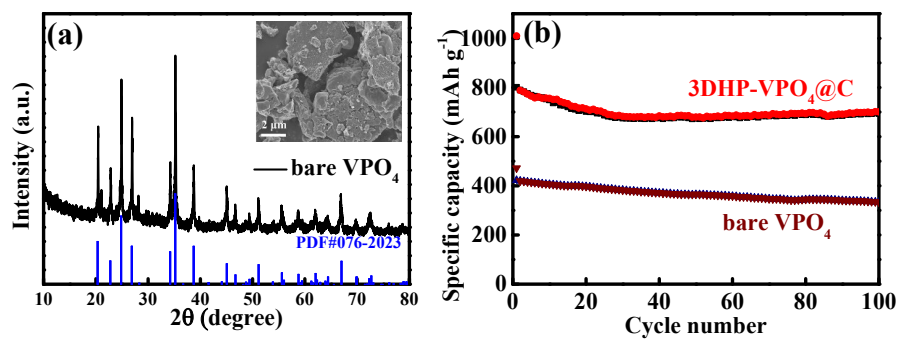

**Fig. S9.** (a) XRD pattern of bare VPO<sub>4</sub> and the inset is its FESEM image; (b) The cycling performances of 3DHP-VPO<sub>4</sub>@C and bare VPO<sub>4</sub> at 100 mA g<sup>-1</sup>.

**Table S1.** Comparison of electrochemical performance between the current electrode and state-of-the-art VPO<sub>4</sub>-based electrodes.

| VPO <sub>4</sub> -based electrodes | Current density (mA g <sup>-1</sup> )/Rate | Initial specific capacity (mA h g <sup>-1</sup> ) | Cycle number | Specific capacity (mA h g <sup>-1</sup> ) | Ref. |
|------------------------------------|--------------------------------------------|---------------------------------------------------|--------------|-------------------------------------------|------|
| VPO <sub>4</sub> /C/Ag             | 0.2 C                                      | 857.8                                             | 100          | 324.2                                     | [S1] |
| VPO <sub>4</sub> /C/3DG            | 0.2 C                                      | 976.8                                             | 30           | 632                                       | [S2] |
|                                    | 5 C                                        | 369                                               | 100          | 338.8                                     |      |
| a-VPO <sub>4</sub> /C              | 200                                        | 1094.6                                            | 50           | 804.5                                     | [S3] |
| Nano-sheets-VPO <sub>4</sub>       | 0.05 C                                     | 788.7                                             |              |                                           | [S4] |
| Core-shell VPO <sub>4</sub> /C     | 20                                         | 887.3                                             | 30           | 343                                       | [S5] |
| MVHP-VPO <sub>4</sub> @C NSs       | 100                                        | 943                                               | 100          | 630                                       | [S6] |
| VPO <sub>4</sub> @C/rGO            | 100                                        | 1074                                              | 100          | 395.3                                     | [S7] |
| VPO <sub>4</sub> /rGO              | 100                                        | 567                                               | 100          | 475                                       | [S8] |
| Current work                       | 100                                        | 1009.4                                            | 100          | 700.5                                     |      |
| (3DHP-VPO <sub>4</sub> @C)         | 2000                                       | 542.1                                             | 2000         | 288.5                                     |      |

**Table S2.** Impedance parameters of 3DHP-VPO<sub>4</sub>@C, VPO<sub>4</sub>@C-700 and VPO<sub>4</sub>@C-900 electrodes fitted with the circuit model of R(QR)(QR)W.

| Electrodes               | R <sub>s</sub> (Ω) | R <sub>ct</sub> (Ω) | Z <sub>w</sub> (Ω) |
|--------------------------|--------------------|---------------------|--------------------|
| 3DHP-VPO <sub>4</sub> @C | 3.5                | 20.4                | 1.5                |
| VPO <sub>4</sub> @C-700  | 7.4                | 46.7                | 5.4                |
| VPO <sub>4</sub> @C-900  | 5.2                | 27.6                | 2.8                |

- [S1] L.Z. Hu, S. Zheng, S.Q. Cheng, Z. Chen, B. Huang, Q.Q. Liu, Q.Q. Chen, Micro/nano-structured Ag coated VPO<sub>4</sub>/C as a high-performance anode material for lithium-ion batteries, *Mater. Lett.* 2019, 246, 40-44.
- [S2] L.Z. Hu, S. Zheng, Z. Chen, B. Huang, J.W. Yang, Q.Q. Chen, 3D graphene modified sphere-like VPO<sub>4</sub>/C as a high-performance anode material for lithium-ion batteries, *Electrochim. Acta* 2018, 284, 609-617.
- [S3] X.H. Nan, C.F. Liu, K. Wang, W.D. Ma, C.K. Zhang, H.Y. Fu, Z.Y. Li, G.Z. Cao, Amorphous VPO<sub>4</sub>/C with the enhanced performances as an anode for lithium ion batteries, *J. Materiomics* 2016, 2, 350-357.
- [S4] J.C. Zheng, Y.D. Han, B. Zhang, C. Shen, L. Ming, X. Ou, J.F. Zhang, Electrochemical Properties of VPO<sub>4</sub>/C Nanosheets and Microspheres As Anode Materials for Lithium-Ion Batteries, *ACS Appl. Mater. Interfaces* 2014, 6, 6223-6226.
- [S5] Y. Zhang, X.J. Zhang, Q. Tang, D.H. Wu, Z. Zhou, Core-shell VPO<sub>4</sub>/C anode materials for Li ion batteries: Computational investigation and sol-gel synthesis, *J. Alloy. Compd.* 2012, 522, 167-171.
- [S6] D. Zhao, T. Meng, J.W. Qin, W. Wang, Z.G. Yin, M.H. Cao, Rational Construction of Multivoids-Assembled Hybrid Nanospheres Based on VPO<sub>4</sub> Encapsulated in Porous Carbon with Superior Lithium Storage Performance, *ACS Appl. Mater. Interfaces* 2017, 9, 1437-1445.
- [S7] L.B. Tang, B. Xiao, C.S. An, H. Li, Z.J. He, J.C. Zheng, VPO<sub>4</sub>@C/graphene microsphere as a potential anode material for lithium ion batteries, *Ceram. Int.* 2018, 44, 14432-14438.

[S8] W. Lu, L.N. Cong, Y.L. Liu, J. Liu, A. Mauger, C.M. Julien, L.Q. Sun, H.M. Xie, Pseudocapacitance controlled fast-charging and long-life lithium ion battery achieved via a 3D mutually embedded VPO<sub>4</sub>/rGO electrode, *J. Alloy. Comp.* 2020, 812, 152135.
